# Supplementary material
Source: publisher figshare collection journal article supplement (https://gsapubs.figshare.com/articles/dataset/_/21919341)
Supplement: Supplementary file 1 [file 1]

## Sheet: Table S2
TABLE S2. SUMMARY OF COBBLE SIZE, GRAIN SIZE, RADIONUCLIDE CONCENTRATIONS (DRY MATERIAL), ESTIMATED WATER-CONTENT AND POROSITY VALUES, AND CALCULATED DOSE RATES
				Minimum diameter		Measured dose rates									Water content*															Dry dose ratesꝉ
Sample	Cobble	Latitude	Longitude		Grain size	Qtz dose rate			K-feld dose rate			Porosity						238U			226Ra			232Th			40K			alpha	rand	syst	beta	rand	syst	gamma	rand	syst
				(mm)	(microns)	(Gr ka-1 ± se)			(Gr ka-1 ± se)			(%)			(%)			(Bq kg -1 ± se)			(Bq kg -1 ± se)			(Bq kg -1 ± se)			(Bq kg -1 ± se)			Gr ka-1			Gr ka-1			Gr ka-1
Site 1 matrix 1		47.0362°N	114.3746°W			3.3483	±	0.0587733	3.6325	±	0.335976	17	±	4	0	±	0	31.357	±	7.073	35.401	±	0.583	37.169	±	0.486	842	±	15	13.5784	0.432609	0.287417	2.73001	0.0447835	0.00796741	1.34882	0.0324509	0.011916
Site 1 matrix 2		47.0362°N	114.3746°W			3.48294	±	0.0588688	3.76474	±	0.348831	17	±	4	0	±	0	39.08	±	5.261	35.781	±	0.514	37.881	±	0.482	886	±	13	13.7811	0.435826	0.292219	2.84965	0.0407102	0.00814208	1.39451	0.0321428	0.0125296
Site 1 scraped silt+clay		47.0362°N	114.3746°W			3.70974	±	0.0559579	3.98848	±	0.371017	17	±	4	25	±	4	46.631	±	8.136	34.69	±	0.698	46.289	±	0.727	928	±	13	15.0991	0.437623	0.337491	3.00208	0.0405931	0.00895254	1.5193	0.0321133	0.013146
Site 2 matrix 1		47.0367°N	114.3719°W			3.69394	±	0.0559052	3.9722	±	0.368775	17	±	4	0	±	0	41.751	±	4.242	32.688	±	0.376	41.968	±	0.413	957	±	9	13.9279	0.396044	0.308466	3.02584	0.0315645	0.00841203	1.47712	0.028606	0.0135236
Site 2 matrix 2		47.0367°N	114.3719°W			3.53606	±	0.358604	3.81711	±	0.353154	17	±	4	0	±	0	36.596	±	2.586	33.353	±	0.275	40.553	±	0.268	903	±	8	13.7989	0.398731	0.301741	2.88658	0.0299947	0.00822689	1.42253	0.0286603	0.0127704
Site 2 scraped silt+clay		47.0367°N	114.3719°W			3.63269	±	0.0551084	3.91292	±	0.363584	17	±	4	25	±	4	38.551	±	5.604	37.472	±	0.545	45.426	±	0.532	890	±	13	15.4784	0.457535	0.338235	2.92802	0.0414157	0.00902169	1.4986	0.0335746	0.0126235
Site 3 matrix		47.03717°N	114.3730°W			1.41265	±	0.0568949	1.28536	±	0.263608	17	±	4	0	±	0	38.915	±	5.607	34.872	±	0.535	41.894	±	0.523	99	±	14	14.3353	0.427277	0.312606	0.882593	0.0424741	0.00768308	0.816102	0.0318159	0.00233019
Cayuse Rock 1-11	C-1-11	47.0362°N	114.3746°W	32	20-100	1.13575	±	0.0586263	1.47473	±	0.0770053	0	±	0	0	±	0	3.072	±	3.515	8.67	±	0.301	8.387	±	0.283	257	±	7	3.19533	0.119186	0.0665152	0.791842	0.0187762	0.00198336	0.361854	0.00987266	0.00362086
Cayuse Rock 3	C-3	47.03717°N	114.3730°W	33	35-104	4.30936	±	0.216636	4.68206	±	0.222398	0	±	0	0	±	0	22.703	±	5.557	26.388	±	0.523	26.582	±	0.539	1061.72	±	20.112	9.91713	0.331987	0.208121	3.12239	0.0538911	0.00676648	1.33383	0.0280045	0.014918
Cayuse Rock 4	C-4	47.03717°N	114.3730°W	50	15-100	2.84187	±	0.144885	3.16759	±	0.152712	0	±	0	0	±	0	28.273	±	1.869	27.663	±	0.266	32.461	±	0.247	556	±	14.912	11.2314	0.331609	0.243609	1.89938	0.041896	0.00640156	1.0141	0.0260385	0.00792021
*Water content is accounted for by assuming 10% silt and clay in the matrix of granules and pebbles.
ꝉDose rates for Alpha, Beta, and Gamma radiation showing their associated random (rand) and systematic (syst) errors.
Qtz = quartz; K-feld = K-feldspar; Gr = Gray; Bq = becquerel; se = standard error.

## Sheet: G50721
Smith, L.N., Sohbati, R., and Jain, M., 2023, Rock surface luminescence dating of gravel determines the age of a glacial outburst megaflood, Glacial Lake Missoula, Montana, USA: Geology, https://doi.org/10.1130/G50721.1
